# Supplementary material for: The Relationship between Brachionus calyciflorus-Associated Bacterial and Bacterioplankton Communities in a Subtropical Freshwater Lake
Source: MDPI journal article supplement (doi:10.3390/ani12223201), 2022-11-18
Supplement: s1 [file s1]

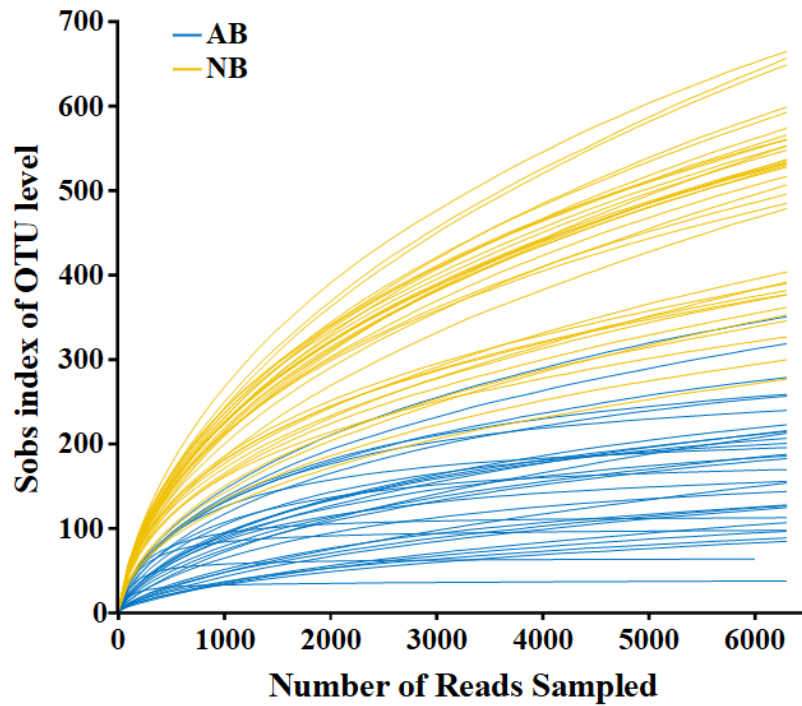

**Figure S1.** Sparse curve of bacterial community. The abscissa represents the amount of sequencing data randomly selected, and the ordinate represents the number of species observed.

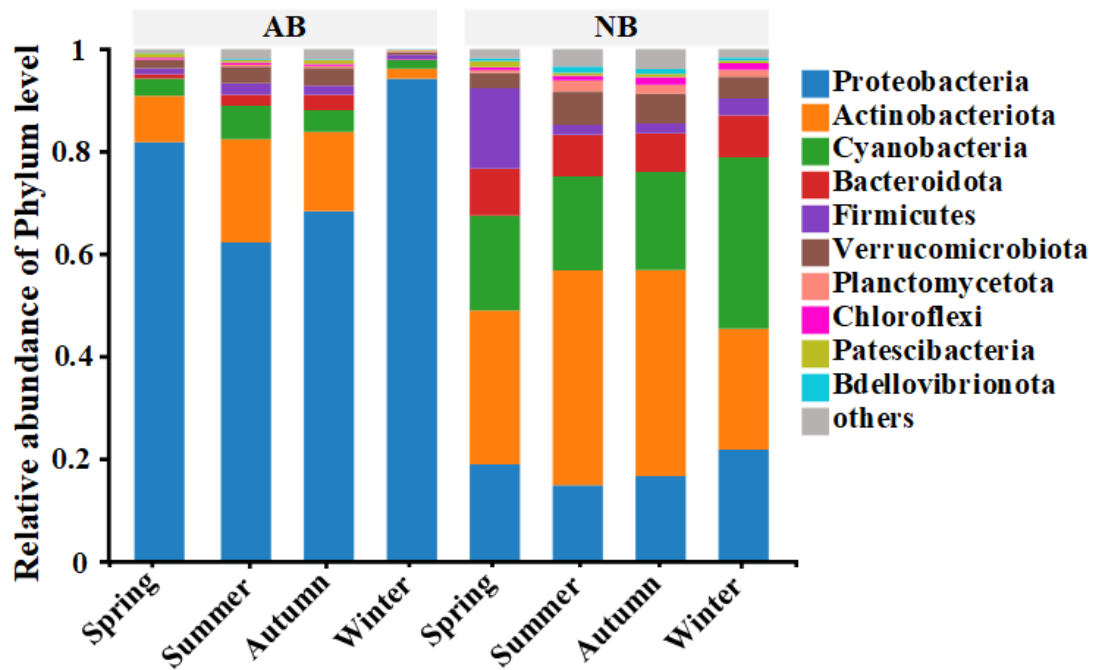

**Figure S2.** Seasonal variation in the community composition of *B. calyciflorus*-associated bacteria and bacterioplankton at phylum level.
