# Supplementary material for: The Relationship between Brachionus calyciflorus-Associated Bacterial and Bacterioplankton Communities in a Subtropical Freshwater Lake
Source: Animals (Basel). 2022 Nov 18;12(22):3201. doi: 10.3390/ani12223201 (PMC9686566; doi:10.3390/ani12223201)
Supplement: Supplementary file 1 [file animals-12-03201-s001.zip › Supplementary Tables.xlsx]

## Sheet: Table S1
Table S1. AB and NB communities alpha diversity index for all samples
Sample\Estimators	shannon	chao	coverage	pd
AB1_1	0.642028	171.045	0.991433	18.3887
AB1_2	0.966232	179	0.991433	21.7707
AB1_3	0.854631	192.44	0.990639	20.0836
AB2_1	0.859751	151.909	0.993971	17.3367
AB2_2	0.775334	125.625	0.99413	12.3477
AB2_3	1.01304	176.286	0.992702	20.7041
AB3_1	1.65707	310.512	0.98588	29.2053
AB3_2	1.51171	289.778	0.988101	23.9911
AB3_3	1.69927	287.077	0.987942	26.275
AB4_1	1.23644	165.037	0.994447	23.3564
AB4_2	1.51698	253.029	0.988894	25.6039
AB4_3	2.02186	322.088	0.986832	32.1596
AB5_1	1.82469	260.25	0.990005	32.6476
AB5_2	1.84045	216.784	0.992226	28.7302
AB5_3	2.85983	212.105	0.995875	30.5582
AB6_2	3.05722	97.5	0.999524	18.4652
AB6_3	1.89637	37.3333	0.999683	8.69796
AB7_1	2.4379	63	0.999841	14.7559
AB8_1	3.02056	363.429	0.985404	39.5001
AB8_2	3.05114	499.17	0.979216	42.5216
AB8_3	2.89911	515.842	0.978106	46.6037
AB9_2	2.92651	262.429	0.993495	38.0637
AB9_3	2.55217	304.226	0.988577	37.5853
AB10_1	2.00142	226.906	0.993337	31.9014
AB10_2	1.46907	173	0.995558	25.9557
AB10_3	3.03059	114	0.999365	21.9662
AB11_1	2.35462	178	0.997144	26.5073
AB11_3	2.86106	297.333	0.990481	37.1142
AB12_1	0.878917	343.273	0.985404	23.0384
AB12_2	1.2753	422.933	0.982072	28.4017
AB12_3	0.657569	143.833	0.993337	16.7078
NB1_1	4.43687	633.714	0.97287	46.1757
NB1_2	4.05886	761.067	0.970966	47.4539
NB1_3	3.48227	562.22	0.974933	44.9008
NB2_1	3.69772	587.625	0.976519	45.791
NB2_2	3.86383	468.5	0.981755	41.5968
NB2_3	4.10219	586.849	0.976202	46.0652
NB3_1	3.06113	405.419	0.983183	32.3651
NB3_2	3.4429	521.538	0.978423	39.6605
NB3_3	3.37494	416.404	0.982389	34.7034
NB4_1	4.28087	511.344	0.979534	44.0224
NB4_2	4.24963	563.778	0.97763	44.685
NB4_3	4.28595	594.625	0.97763	46.128
NB5_1	4.48461	764.936	0.966365	63.1489
NB5_2	4.43894	802.786	0.965096	61.1016
NB5_3	4.65834	856.261	0.963192	64.8499
NB6_1	4.29503	704.577	0.97049	57.5874
NB6_2	4.51724	792.25	0.966683	64.1696
NB6_3	4.49148	995.674	0.958115	69.37
NB7_1	4.41107	778.099	0.96811	58.1269
NB7_2	4.6586	825.641	0.964779	65.1282
NB7_3	4.72747	842.674	0.964937	64.0922
NB8_1	4.20809	988.114	0.958274	65.0238
NB8_2	4.39064	935.25	0.95986	69.8381
NB8_3	4.47727	968.561	0.957163	68.2258
NB9_1	4.53751	1090.85	0.951769	75.1859
NB9_2	4.59135	1163.42	0.950658	76.4645
NB9_3	4.75383	1017.24	0.955894	74.5099
NB10_1	4.46673	766.297	0.967158	64.4644
NB10_2	4.58608	819.179	0.965255	64.5719
NB10_3	4.61253	889.513	0.963985	69.563
NB11_1	4.26616	895.443	0.962875	61.1435
NB11_2	4.12905	863	0.963351	57.9947
NB11_3	4.55816	810.57	0.965255	62.6823
NB12_1	4.51853	858.783	0.963827	61.8189
NB12_2	4.31626	824.554	0.964779	60.804
NB12_3	4.36556	834.172	0.962558	63.4209

## Sheet: Table S2
Table S2. Sampling time and physicochemical factors for all samples
Sampling dates	2022-01-01			2022-02-01			2022-03-01			2022-04-01			2022-05-01			2021-06-01			2021-07-01			2021-08-01			2021-09-01			2021-10-01			2021-11-01			2021-12-01			2022-01-01			2022-02-01			2022-03-01			2022-04-01			2022-05-01
SampleID	AB1_1	AB1_2	AB1_3	AB2_1	AB2_2	AB2_3	AB3_1	AB3_2	AB3_3	AB4_1	AB4_2	AB4_3	AB5_1	AB5_2	AB5_3	AB6_1	AB6_2	AB6_3	AB7_1	AB7_2	AB7_3	AB8_1	AB8_2	AB8_3	AB9_1	AB9_2	AB9_3	AB10_1	AB10_2	AB10_3	AB11_1	AB11_2	AB11_3	AB12_1	AB12_2	AB12_3	NB1_1	NB1_2	NB1_3	NB2_1	NB2_2	NB2_3	NB3_1	NB3_2	NB3_3	NB4_1	NB4_2	NB4_3	NB5_1
T	7.6	7.6	7.5	7.7	7.6	7.7	20.8	20.4	20.2	26.7	27.3	26.9	25.4	25.4	25.5	27.9	27.9	28.2	29.1	29.2	29.2	31.8	31.8	31.9	29.9	29.7	29.9	28.4	28.5	28.5	15.3	15.2	15.3	12.1	11.9	12.1	7.6	7.6	7.5	7.7	7.6	7.7	20.8	20.4	20.2	26.7	27.3	26.9	25.4
DO	7.08	7.4	7.35	11.62	10.54	10.02	1.23	1.37	1.54	3.11	3.67	4.16	2.57	2.74	2.82	2.53	2.85	2.84	1.6	1.76	1.66	1.88	1.88	1.76	2.69	2.64	2.61	1.86	2.29	2.55	4.87	4.83	5.05	4.31	4.62	4.52	7.08	7.4	7.35	11.62	10.54	10.02	1.23	1.37	1.54	3.11	3.67	4.16	2.57
pH	9.57	9.03	8.76	9.54	9.61	9.75	9.04	9.36	9.71	10.25	10.26	10.3	9.86	9.66	9.6	8.98	9.08	9.12	8.89	8.95	8.55	8.95	8.89	8.85	8.96	8.96	8.93	9.4	9.55	9.72	9.29	9.27	9.35	9.87	9.86	9.98	9.57	9.03	8.76	9.54	9.61	9.75	9.04	9.36	9.71	10.25	10.26	10.3	9.86
TN	0.8326	0.8231	0.7954	0.7824	0.8093	0.8737	1.0714	1.0238	0.9146	0.6017	0.6659	0.7725	1.0894	1.0436	1.0772	0.7142	0.6433	0.6776	0.858	0.785	0.703	0.9291	0.7533	1.1406	0.7518	0.7845	0.85	0.7975	0.7681	0.7804	0.7845	0.8308	0.8159	0.8569	0.8772	0.8551	0.8326	0.8231	0.7954	0.7824	0.8093	0.8737	1.0714	1.0238	0.9146	0.6017	0.6659	0.7725	1.0894
TP	0.06687	0.07283	0.06428	0.05377	0.05487	0.05822	0.07433	0.07363	0.07431	0.04843	0.05162	0.06164	0.1057	0.1078	0.1105	0.08295	0.08226	0.08873	0.1024	0.1004	0.07862	0.1189	0.1074	0.1112	0.0913	0.09807	0.1028	0.08471	0.08195	0.08167	0.07646	0.08082	0.07818	0.07086	0.0638	0.06462	0.06687	0.07283	0.06428	0.05377	0.05487	0.05822	0.07433	0.07363	0.07431	0.04843	0.05162	0.06164	0.1057
PO4	0.003695	0.006718	0.010593	0.011593	0.014823	0.011853	0.010653	0.003495	0.004127	0.002942	0.005345	0.006197	0.014163	0.013483	0.016133	0.02116	0.01645	0.01598	0.01258	0.03059	0.01638	0.02802	0.04253	0.0563	0.02641	0.02388	0.0368	0.005024	0.005179	0.005367	0.02702	0.02628	0.02632	0.005577	0.004337	0.009383	0.003695	0.006718	0.010593	0.011593	0.014823	0.011853	0.010653	0.003495	0.004127	0.002942	0.005345	0.006197	0.014163
NH4	0.1417	0.1883	0.1988	0.1271	0.1705	0.13	0.2236	0.1697	0.2006	0.07477	0.09609	0.1197	0.1759	0.2152	0.2268	0.1542	0.1542	0.1296	0.1595	0.186	0.1601	0.2064	0.1902	0.1781	0.1923	0.1886	0.1964	0.1028	0.08527	0.1216	0.282	0.2864	0.2653	0.09464	0.1524	0.1005	0.1417	0.1883	0.1988	0.1271	0.1705	0.13	0.2236	0.1697	0.2006	0.07477	0.09609	0.1197	0.1759
NO3	0.02166	0.01998	0.02313	0.04666	0.0429	0.05044	0.02632	0.02597	0.02285	0.01847	0.02103	0.02096	0.02327	0.02303	0.02369	0.15955	0.15095	0.144475	0.145875	0.1414	0.14615	0.152725	0.15885	0.146925	0.160775	0.1549	0.1529	0.153075	0.149825	0.155775	0.204425	0.182675	0.19925	0.03596	0.03176	0.03288	0.02166	0.01998	0.02313	0.04666	0.0429	0.05044	0.02632	0.02597	0.02285	0.01847	0.02103	0.02096	0.02327
[truncated: 23 more columns]

## Sheet: Table S3
Table S3. Network centrality coefficients for co-occurrence network analysis of AB and NB communities
AB						NB
Node ID	Node Name	Degree Centrality	Closeness Centrality	Betweenness Centrality		Node ID	Node Name	Degree Centrality	Closeness Centrality	Betweenness Centrality
1	OTU2180	0.377778	0.5	0.0109807		1	OTU2349	0.463415	0.488095	0.0263102
2	OTU2508	0.577778	0.633803	0.0186642		2	OTU717	0.121951	0.394231	0.0399162
3	OTU2400	0.222222	0.454545	0.000462475		3	OTU2751	0.170732	0.405941	0.139723
4	OTU2179	0.555556	0.625	0.024336		4	OTU2166	0.439024	0.532468	0.203158
5	OTU2349	0.111111	0.412844	0		5	OTU2179	0.536585	0.539474	0.0351883
6	OTU117	0.111111	0.428571	0.000763958		6	OTU2205	0.0731707	0.317829	0.141463
7	OTU2205	0.266667	0.5	0.00449975		7	OTU2441	0.0243902	0.242604	0
8	OTU2647	0.155556	0.445545	0.00104856		8	OTU2515	0.536585	0.554054	0.04727
9	OTU2441	0.111111	0.428571	0.000112233		9	OTU4018	0.512195	0.518987	0.0148655
10	OTU4018	0.511111	0.576923	0.0187394		10	OTU2846	0.0731707	0.359649	0.0104226
11	OTU1258	0.155556	0.45	0.000332492		11	OTU4131	0.487805	0.525641	0.0275387
12	OTU2691	0.4	0.54878	0.00997202		12	OTU2817	0.0487805	0.245509	0.0487805
13	OTU4131	0.555556	0.625	0.0164761		13	OTU2462	0.536585	0.518987	0.0438816
14	OTU2225	0.0666667	0.298013	0.0878788		14	OTU2884	0.0487805	0.353448	0
15	OTU2884	0.0888889	0.405405	0.127469		15	OTU2439	0.243902	0.414141	0.0113512
16	OTU2662	0.244444	0.483871	0.0021216		16	OTU2662	0.0731707	0.275168	0
17	OTU2332	0.577778	0.633803	0.0287729		17	OTU2647	0.0731707	0.275168	0
18	OTU3922	0.555556	0.625	0.0211796		18	OTU2332	0.536585	0.518987	0.00859728
19	OTU828	0.0222222	0.290323	0		19	OTU3922	0.560976	0.561644	0.0478901
20	OTU2404	0.0666667	0.405405	0.0444444		20	OTU2619	0.414634	0.465909	0.000419012
21	OTU5	0.4	0.542169	0.0142928		21	OTU2398	0.560976	0.532468	0.0815149
22	OTU2203	0.244444	0.494505	0.00192571		22	OTU3299	0.463415	0.5	0.00245628
23	OTU2544	0.6	0.642857	0.057429		23	OTU2544	0.512195	0.5125	0.00438727
24	OTU2751	0.155556	0.46875	0.0117971		24	OTU4064	0.097561	0.369369	0.139024
25	OTU2255	0.244444	0.494505	0.0276699		25	OTU2380	0.0487805	0.29927	0.095122
26	OTU4064	0.577778	0.616438	0.04089		26	OTU2630	0.463415	0.476744	0.00102637
27	OTU2380	0.511111	0.584416	0.0275726		27	OTU2852	0.536585	0.561644	0.074283
28	OTU2563	0.0222222	0.230769	0		28	OTU2197	0.195122	0.42268	0.0254297
29	OTU3989	0.444444	0.555556	0.00745427		29	OTU2756	0.0487805	0.315385	0
30	OTU2852	0.577778	0.633803	0.0318679		30	OTU3898	0.195122	0.431579	0.20198
31	OTU3901	0.0222222	0.230769	0		31	OTU3901	0.0487805	0.234286	0.0487805
32	OTU4176	0.511111	0.576923	0.0143695		32	OTU2400	0.0243902	0.190698	0
33	OTU2456	0.511111	0.584416	0.0827666		33	OTU2823	0.560976	0.561644	0.0524556
34	OTU2519	0.111111	0.39823	0.000704262		34	OTU4176	0.585366	0.569444	0.0594232
35	OTU2907	0.0666667	0.416667	0.0444444		35	OTU1746	0.0731707	0.275168	0
36	OTU118	0.0222222	0.296053	0		36	OTU2534	0.390244	0.460674	0.00094158
37	OTU706	0.6	0.642857	0.0291338		37	OTU2907	0.0243902	0.198068	0
38	OTU1587	0.577778	0.6	0.0288268		38	OTU728	0.0487805	0.286713	0
39	OTU30	0.311111	0.5	0.00224504		39	OTU2845	0.390244	0.476744	0.0231443
40	OTU2845	0.644444	0.671642	0.130092		40	OTU2577	0.512195	0.5125	0.00438727
41	OTU2577	0.555556	0.625	0.016527		41	OTU2644	0.414634	0.506173	0.022531
42	OTU2436	0.177778	0.483871	0.024168		42	OTU2436	0.317073	0.476744	0.0151173
43	OTU2247	0.355556	0.529412	0.0165023
44	OTU2715	0.4	0.542169	0.00268418
45	OTU2793	0.177778	0.478723	0.027991
46	OTU2348	0.377778	0.576923	0.115139

## Sheet: Table S4
Table S4. Edge and node information for co-occurrence network analysis of AB and NB communities
AB				NB
Node_Num = 46				Node_Num = 42
Edge_Num = 336				Edge_Num = 256
Node1_Name	Node2_Name	Coefficient		Node1_Name	Node2_Name	Coefficient
OTU2180	OTU4176	0.70812		OTU2349	OTU2823	0.842768
OTU2180	OTU2456	0.846513		OTU2349	OTU717	0.624011
OTU2180	OTU2508	-0.7382		OTU2349	OTU4176	-0.805637
OTU2180	OTU2519	0.706913		OTU2349	OTU2534	-0.692045
OTU2180	OTU2179	0.631725		OTU2349	OTU2179	-0.698304
OTU2180	OTU706	-0.713371		OTU2349	OTU2845	-0.691247
OTU2180	OTU117	0.759652		OTU2349	OTU2515	0.721853
OTU2180	OTU30	0.602247		OTU2349	OTU4018	-0.781859
OTU2180	OTU2577	0.605741		OTU2349	OTU2462	0.696734
OTU2180	OTU4018	0.670409		OTU2349	OTU2439	0.689508
OTU2180	OTU2715	-0.624674		OTU2349	OTU2577	-0.74121
OTU2180	OTU4131	0.611101		OTU2349	OTU2332	-0.747627
OTU2180	OTU3922	0.747637		OTU2349	OTU3922	-0.664551
OTU2180	OTU5	0.630642		OTU2349	OTU2398	-0.724326
OTU2180	OTU1587	0.68183		OTU2349	OTU3299	0.603856
OTU2180	OTU3989	0.719591		OTU2349	OTU2544	-0.655046
OTU2180	OTU2852	0.716824		OTU2349	OTU2630	0.703486
OTU2508	OTU2400	-0.725624		OTU2349	OTU2852	-0.711006
OTU2508	OTU2179	-0.859724		OTU2349	OTU2197	0.753504
OTU2508	OTU4018	-0.722048		OTU717	OTU2846	0.641564
OTU2508	OTU2691	-0.673089		OTU717	OTU2852	-0.614624
OTU2508	OTU4131	-0.751659		OTU717	OTU2398	-0.625402
OTU2508	OTU2332	-0.784813		OTU717	OTU728	0.634595
OTU2508	OTU3922	-0.887709		OTU2751	OTU2166	0.749854
OTU2508	OTU5	-0.668195		OTU2751	OTU2179	0.757009
OTU2508	OTU2203	-0.618392		OTU2751	OTU2845	0.642849
OTU2508	OTU2544	-0.733872		OTU2751	OTU2644	0.663317
OTU2508	OTU2255	-0.721836		OTU2751	OTU2436	0.639419
OTU2508	OTU4064	-0.813998		OTU2751	OTU4131	0.658897
OTU2508	OTU2380	-0.70783		OTU2751	OTU2380	0.641381
OTU2508	OTU3989	-0.832156		OTU2166	OTU2823	-0.641333
OTU2508	OTU2852	-0.868813		OTU2166	OTU4176	0.655365
OTU2508	OTU4176	-0.873761		OTU2166	OTU2179	0.796475
OTU2508	OTU2456	-0.777135		OTU2166	OTU2515	-0.650341
OTU2508	OTU706	0.894635		OTU2166	OTU4018	0.632122
OTU2508	OTU1587	-0.842784		OTU2166	OTU2644	0.859829
OTU2508	OTU30	-0.637574		OTU2166	OTU4131	0.725449
OTU2508	OTU2845	-0.783239		OTU2166	OTU2462	-0.633528
OTU2508	OTU2577	-0.797183		OTU2166	OTU2577	0.688599
OTU2508	OTU2247	-0.720404		OTU2166	OTU2332	0.691317
OTU2508	OTU2715	0.798186		OTU2166	OTU3922	0.651947
OTU2508	OTU2348	-0.689314		OTU2166	OTU2398	0.690157
OTU2400	OTU4176	0.788647		OTU2166	OTU3299	-0.71539
OTU2400	OTU2179	0.673652		OTU2166	OTU2544	0.670804
OTU2400	OTU706	-0.646246		OTU2166	OTU4064	0.613158
OTU2400	OTU1587	0.688528		OTU2166	OTU2852	0.694632
OTU2400	OTU2577	0.623328		OTU2166	OTU2436	0.754088
OTU2400	OTU2715	-0.664817		OTU2179	OTU2515	-0.61566
OTU2400	OTU3922	0.687506		OTU2179	OTU4018	0.701359
OTU2400	OTU2255	0.724029		OTU2179	OTU4131	0.639306
OTU2400	OTU2852	0.711076		OTU2179	OTU2462	-0.606617
OTU2179	OTU2349	-0.600969		OTU2179	OTU2332	0.632552
OTU2179	OTU4018	0.714192		OTU2179	OTU3922	0.769448
OTU2179	OTU2691	0.614267		OTU2179	OTU2619	0.649443
OTU2179	OTU4131	0.746467		OTU2179	OTU2398	0.830459
OTU2179	OTU2662	0.613714		OTU2179	OTU3299	-0.616731
OTU2179	OTU2332	0.689867		OTU2179	OTU2544	0.682211
OTU2179	OTU3922	0.813021		OTU2179	OTU2630	-0.60866
OTU2179	OTU2544	0.662952		OTU2179	OTU2852	0.764907
OTU2179	OTU2255	0.638295		OTU2179	OTU2823	-0.643518
OTU2179	OTU4064	0.76421		OTU2179	OTU4176	0.700929
OTU2179	OTU2380	0.725697		OTU2179	OTU2534	0.621873
OTU2179	OTU3989	0.726889		OTU2179	OTU2845	0.634411
OTU2179	OTU2852	0.788085		OTU2179	OTU2577	0.68079
OTU2179	OTU4176	0.900249		OTU2179	OTU2644	0.726267
OTU2179	OTU2456	0.63279		OTU2179	OTU2436	0.74615
OTU2179	OTU706	-0.912073		OTU2205	OTU2817	0.610739
OTU2179	OTU1587	0.822745		OTU2205	OTU3898	0.707279
OTU2179	OTU30	0.607757		OTU2205	OTU2441	0.69207
OTU2179	OTU2845	0.728107		OTU2515	OTU4018	-0.859987
OTU2179	OTU2577	0.839664		OTU2515	OTU4131	-0.71456
OTU2179	OTU2715	-0.706595		OTU2515	OTU2462	0.843201
OTU2179	OTU2348	0.657626		OTU2515	OTU2439	0.740711
OTU2349	OTU4176	-0.605967		OTU2515	OTU2332	-0.885395
OTU2349	OTU3989	-0.605205		OTU2515	OTU3922	-0.836563
OTU2349	OTU1587	-0.729233		OTU2515	OTU2619	-0.694249
OTU2349	OTU706	0.605995		OTU2515	OTU2398	-0.76457
OTU117	OTU2519	0.627555		OTU2515	OTU3299	0.795078
OTU117	OTU1587	0.609533		OTU2515	OTU2544	-0.79619
OTU117	OTU2852	0.60368		OTU2515	OTU2630	0.780193
OTU117	OTU2456	0.685386		OTU2515	OTU2852	-0.741032
OTU2205	OTU2647	0.624499		OTU2515	OTU2197	0.745095
OTU2205	OTU2441	0.752833		OTU2515	OTU3898	0.706961
OTU2205	OTU2691	0.769023		OTU2515	OTU2823	0.915661
OTU2205	OTU4131	0.613971		OTU2515	OTU4176	-0.90538
OTU2205	OTU2348	0.616724		OTU2515	OTU2534	-0.730287
OTU2205	OTU2332	0.682392		OTU2515	OTU2577	-0.841008
OTU2205	OTU3922	0.671812		OTU2515	OTU2644	-0.648521
OTU2205	OTU2845	0.640755		OTU4018	OTU4176	0.86981
OTU2205	OTU2577	0.609133		OTU4018	OTU2823	-0.859584
OTU2205	OTU2544	0.777112		OTU4018	OTU4131	0.778556
OTU2205	OTU4064	0.779949		OTU4018	OTU2462	-0.857591
OTU2205	OTU2380	0.671599		OTU4018	OTU2439	-0.741878
OTU2647	OTU2691	0.670376		OTU4018	OTU2577	0.875095
OTU2647	OTU2793	0.660116		OTU4018	OTU2332	0.822143
OTU2647	OTU2662	0.791729		OTU4018	OTU3922	0.863726
OTU2647	OTU2544	0.666984		OTU4018	OTU2619	0.839017
OTU2647	OTU4064	0.694297		OTU4018	OTU2398	0.771097
OTU2647	OTU2380	0.676728		OTU4018	OTU3299	-0.793792
OTU2441	OTU2380	0.609522		OTU4018	OTU2544	0.810563
OTU2441	OTU4018	0.642713		OTU4018	OTU2534	0.777459
OTU2441	OTU2544	0.656885		OTU4018	OTU2630	-0.731121
OTU2441	OTU4064	0.622203		OTU4018	OTU2852	0.713211
OTU4018	OTU1258	0.670101		OTU4018	OTU2197	-0.617434
OTU4018	OTU4131	0.771058		OTU4018	OTU2845	0.788196
OTU4018	OTU2332	0.814749		OTU2846	OTU2398	-0.614082
OTU4018	OTU3922	0.812937		OTU2846	OTU728	0.681007
OTU4018	OTU5	0.751293		OTU4131	OTU2823	-0.693561
OTU4018	OTU2203	0.679451		OTU4131	OTU4176	0.782901
OTU4018	OTU2544	0.67085		OTU4131	OTU2845	0.69435
OTU4018	OTU4064	0.669135		OTU4131	OTU2644	0.788406
OTU4018	OTU2380	0.720908		OTU4131	OTU2462	-0.727712
OTU4018	OTU3989	0.613814		OTU4131	OTU2577	0.837633
OTU4018	OTU2852	0.799436		OTU4131	OTU2332	0.729989
OTU4018	OTU4176	0.767613		OTU4131	OTU3922	0.752634
OTU4018	OTU2456	0.775009		OTU4131	OTU2619	0.666319
OTU4018	OTU706	-0.699737		OTU4131	OTU2398	0.708246
OTU4018	OTU1587	0.749379		OTU4131	OTU3299	-0.794985
OTU4018	OTU30	0.606259		OTU4131	OTU2544	0.895002
OTU4018	OTU2845	0.817197		OTU4131	OTU2630	-0.697555
OTU4018	OTU2577	0.900151		OTU4131	OTU2852	0.763431
OTU4018	OTU2715	-0.70591		OTU4131	OTU2436	0.72328
OTU1258	OTU30	0.675695		OTU2817	OTU2907	0.850969
OTU1258	OTU2845	0.654854		OTU2462	OTU2884	0.609426
OTU1258	OTU2332	0.63768		OTU2462	OTU2439	0.736017
OTU1258	OTU3922	0.618965		OTU2462	OTU2332	-0.867055
OTU1258	OTU5	0.687865		OTU2462	OTU3922	-0.817697
OTU1258	OTU2203	0.614125		OTU2462	OTU2619	-0.662405
OTU2691	OTU4176	0.601056		OTU2462	OTU2398	-0.704699
OTU2691	OTU706	-0.624001		OTU2462	OTU3299	0.870399
OTU2691	OTU1587	0.654967		OTU2462	OTU2544	-0.809973
OTU2691	OTU2577	0.623057		OTU2462	OTU2630	0.778315
OTU2691	OTU4131	0.636033		OTU2462	OTU2852	-0.716348
OTU2691	OTU2348	0.603047		OTU2462	OTU2823	0.819919
OTU2691	OTU2662	0.699702		OTU2462	OTU4176	-0.856788
OTU2691	OTU2332	0.64048		OTU2462	OTU2534	-0.602315
OTU2691	OTU3922	0.720896		OTU2462	OTU2845	-0.803939
OTU2691	OTU2544	0.688388		OTU2462	OTU2577	-0.831153
OTU2691	OTU2255	0.637066		OTU2462	OTU2644	-0.613714
OTU2691	OTU4064	0.740436		OTU2884	OTU2439	0.669097
OTU2691	OTU2380	0.744492		OTU2439	OTU4176	-0.649447
OTU2691	OTU2852	0.68732		OTU2439	OTU2823	0.805127
OTU4131	OTU2662	0.710373		OTU2439	OTU2332	-0.653573
OTU4131	OTU2332	0.737902		OTU2439	OTU3922	-0.605147
OTU4131	OTU3922	0.809877		OTU2439	OTU2197	0.75458
OTU4131	OTU5	0.661091		OTU2662	OTU4064	0.929054
OTU4131	OTU2544	0.759629		OTU2662	OTU2647	0.859902
OTU4131	OTU2255	0.60131		OTU2662	OTU1746	0.767403
OTU4131	OTU4064	0.737594		OTU2647	OTU4064	0.839459
OTU4131	OTU2380	0.90466		OTU2647	OTU1746	0.77561
OTU4131	OTU3989	0.63621		OTU2332	OTU3922	0.830636
OTU4131	OTU2852	0.741067		OTU2332	OTU2619	0.673038
OTU4131	OTU4176	0.722532		OTU2332	OTU2398	0.673776
OTU4131	OTU2456	0.698902		OTU2332	OTU3299	-0.861228
OTU4131	OTU706	-0.725585		OTU2332	OTU2544	0.825512
OTU4131	OTU1587	0.691341		OTU2332	OTU2630	-0.795701
OTU4131	OTU30	0.642604		OTU2332	OTU2852	0.750402
OTU4131	OTU2845	0.850692		OTU2332	OTU2823	-0.852613
OTU4131	OTU2577	0.878988		OTU2332	OTU4176	0.870988
OTU4131	OTU2715	-0.676769		OTU2332	OTU2534	0.689566
OTU4131	OTU2348	0.753598		OTU2332	OTU2845	0.641836
OTU2225	OTU3901	0.673863		OTU2332	OTU2577	0.843459
OTU2225	OTU2563	0.672536		OTU2332	OTU2644	0.66068
OTU2225	OTU2884	0.719961		OTU2332	OTU2436	0.616919
OTU2884	OTU2436	0.658741		OTU3922	OTU2619	0.84868
OTU2884	OTU2348	0.604417		OTU3922	OTU2398	0.798364
OTU2884	OTU2793	0.607936		OTU3922	OTU3299	-0.820744
OTU2662	OTU706	-0.60039		OTU3922	OTU2544	0.890409
OTU2662	OTU1587	0.625927		OTU3922	OTU2630	-0.776007
OTU2662	OTU2577	0.663645		OTU3922	OTU2852	0.813407
OTU2662	OTU2845	0.631351		OTU3922	OTU3898	-0.618562
OTU2662	OTU2544	0.64245		OTU3922	OTU2823	-0.750622
OTU2662	OTU4064	0.710054		OTU3922	OTU4176	0.874391
OTU2662	OTU2380	0.771099		OTU3922	OTU2534	0.8015
OTU2332	OTU3922	0.833133		OTU3922	OTU2845	0.676923
OTU2332	OTU5	0.669533		OTU3922	OTU2577	0.866928
OTU2332	OTU2203	0.805954		OTU3922	OTU2644	0.678789
OTU2332	OTU2544	0.819718		OTU3922	OTU2436	0.708759
OTU2332	OTU4064	0.772086		OTU2619	OTU2823	-0.658796
OTU2332	OTU2380	0.732928		OTU2619	OTU4176	0.791409
OTU2332	OTU3989	0.631707		OTU2619	OTU2534	0.799936
OTU2332	OTU2852	0.800292		OTU2619	OTU2845	0.624317
OTU2332	OTU4176	0.736042		OTU2619	OTU2577	0.814693
OTU2332	OTU2456	0.6327		OTU2619	OTU2398	0.761985
OTU2332	OTU706	-0.670826		OTU2619	OTU3299	-0.700047
OTU2332	OTU1587	0.727368		OTU2619	OTU2544	0.747143
OTU2332	OTU30	0.633518		OTU2619	OTU2630	-0.717523
OTU2332	OTU2845	0.85061		OTU2619	OTU2852	0.643653
OTU2332	OTU2577	0.858813		OTU2398	OTU3299	-0.685269
OTU2332	OTU2436	0.631898		OTU2398	OTU2544	0.773628
OTU2332	OTU2247	0.602183		OTU2398	OTU2630	-0.736781
OTU2332	OTU2715	-0.703319		OTU2398	OTU2852	0.802168
OTU2332	OTU2348	0.601358		OTU2398	OTU2823	-0.731748
OTU3922	OTU2544	0.759877		OTU2398	OTU4176	0.87236
OTU3922	OTU4064	0.7884		OTU2398	OTU2534	0.765874
OTU3922	OTU2380	0.792343		OTU2398	OTU2845	0.607967
OTU3922	OTU3989	0.749695		OTU2398	OTU2577	0.824546
OTU3922	OTU2852	0.900493		OTU2398	OTU2644	0.701204
OTU3922	OTU4176	0.884214		OTU2398	OTU2436	0.74296
OTU3922	OTU2456	0.726568		OTU3299	OTU4176	-0.823657
OTU3922	OTU706	-0.82712		OTU3299	OTU2823	0.707267
OTU3922	OTU1587	0.864438		OTU3299	OTU2644	-0.711515
OTU3922	OTU30	0.651184		OTU3299	OTU2577	-0.826984
OTU3922	OTU2845	0.828115		OTU3299	OTU2544	-0.809625
OTU3922	OTU2577	0.888944		OTU3299	OTU2845	-0.7205
OTU3922	OTU2247	0.652937		OTU3299	OTU2630	0.823098
OTU3922	OTU2715	-0.818036		OTU3299	OTU2852	-0.712443
OTU3922	OTU2348	0.641952		OTU2544	OTU4176	0.887496
OTU828	OTU2404	0.712913		OTU2544	OTU2823	-0.760838
OTU2404	OTU2255	0.630449		OTU2544	OTU2436	0.784458
OTU2404	OTU2456	0.618501		OTU2544	OTU2577	0.915273
OTU5	OTU2519	0.726244		OTU2544	OTU2644	0.78841
OTU5	OTU706	-0.671987		OTU2544	OTU2534	0.702721
OTU5	OTU1587	0.656932		OTU2544	OTU2630	-0.730248
OTU5	OTU2456	0.72863		OTU2544	OTU2852	0.867833
OTU5	OTU2845	0.737857		OTU2544	OTU2845	0.687995
OTU5	OTU2577	0.634557		OTU4064	OTU1746	0.817731
OTU5	OTU2247	0.646189		OTU2380	OTU3901	-0.681933
OTU5	OTU2203	0.664361		OTU2630	OTU4176	-0.834355
OTU5	OTU2544	0.609081		OTU2630	OTU2534	-0.664191
OTU5	OTU30	0.742744		OTU2630	OTU2823	0.734293
OTU5	OTU3989	0.677526		OTU2630	OTU2644	-0.614365
OTU5	OTU2852	0.601934		OTU2630	OTU2577	-0.763065
OTU2203	OTU2456	0.612238		OTU2630	OTU2845	-0.642664
OTU2203	OTU2247	0.626138		OTU2630	OTU2852	-0.709754
OTU2203	OTU2845	0.637674		OTU2852	OTU3898	-0.601574
OTU2203	OTU2544	0.623117		OTU2852	OTU2823	-0.742164
OTU2203	OTU4064	0.60441		OTU2852	OTU4176	0.820077
OTU2203	OTU2852	0.618779		OTU2852	OTU2534	0.677131
OTU2544	OTU2751	0.694031		OTU2852	OTU2577	0.804681
OTU2544	OTU4064	0.819094		OTU2852	OTU2644	0.869107
OTU2544	OTU2380	0.785682		OTU2852	OTU2436	0.770851
OTU2544	OTU2852	0.719455		OTU2197	OTU4176	-0.665963
OTU2544	OTU4176	0.614396		OTU2197	OTU2823	0.859189
OTU2544	OTU2456	0.624418		OTU2197	OTU2756	0.650454
OTU2544	OTU706	-0.625334		OTU2197	OTU3898	0.699646
OTU2544	OTU1587	0.627158		OTU2756	OTU3898	0.695498
OTU2544	OTU2845	0.864176		OTU3898	OTU2823	0.632119
OTU2544	OTU2577	0.778259		OTU3898	OTU4176	-0.611739
OTU2544	OTU2436	0.782048		OTU3901	OTU2400	0.664237
OTU2544	OTU2247	0.64491		OTU2823	OTU4176	-0.883827
OTU2544	OTU2793	0.774385		OTU2823	OTU2534	-0.717875
OTU2544	OTU2348	0.737767		OTU2823	OTU2845	-0.615245
OTU2751	OTU2907	0.644715		OTU2823	OTU2577	-0.815796
OTU2751	OTU2845	0.66213		OTU2823	OTU2644	-0.607347
OTU2751	OTU2436	0.649255		OTU4176	OTU2534	0.821954
OTU2751	OTU2247	0.654858		OTU4176	OTU2845	0.694308
OTU2751	OTU2793	0.701894		OTU4176	OTU2577	0.936872
OTU2751	OTU4064	0.625012		OTU4176	OTU2644	0.684631
OTU2255	OTU4176	0.63417		OTU4176	OTU2436	0.695365
OTU2255	OTU2456	0.642144		OTU2534	OTU2436	0.611351
OTU2255	OTU706	-0.648666		OTU2534	OTU2577	0.802789
OTU2255	OTU2348	0.645615		OTU2845	OTU2577	0.700604
OTU2255	OTU2852	0.695598		OTU2577	OTU2644	0.714848
OTU4064	OTU2380	0.816124		OTU2577	OTU2436	0.689887
OTU4064	OTU3989	0.650633		OTU2644	OTU2436	0.799892
OTU4064	OTU2852	0.724177
OTU4064	OTU4176	0.704621
OTU4064	OTU706	-0.757575
OTU4064	OTU1587	0.688787
OTU4064	OTU2845	0.804806
OTU4064	OTU2577	0.769642
OTU4064	OTU2247	0.612982
OTU4064	OTU2715	-0.651059
OTU4064	OTU2793	0.643607
OTU4064	OTU2348	0.67975
OTU2380	OTU2852	0.715801
OTU2380	OTU4176	0.644582
OTU2380	OTU706	-0.665083
OTU2380	OTU1587	0.645712
OTU2380	OTU2845	0.802616
OTU2380	OTU2577	0.835335
OTU2380	OTU2436	0.602337
OTU2380	OTU2715	-0.629556
OTU2380	OTU2793	0.61028
OTU2380	OTU2348	0.733294
OTU3989	OTU4176	0.733753
OTU3989	OTU2247	0.602731
OTU3989	OTU1587	0.806262
OTU3989	OTU2456	0.63534
OTU3989	OTU2845	0.604903
OTU3989	OTU2577	0.642186
OTU3989	OTU30	0.74873
OTU3989	OTU2715	-0.766925
OTU3989	OTU2852	0.755372
OTU3989	OTU706	-0.826069
OTU2852	OTU4176	0.859721
OTU2852	OTU2456	0.776948
OTU2852	OTU706	-0.815676
OTU2852	OTU1587	0.841607
OTU2852	OTU2845	0.755632
OTU2852	OTU2577	0.857547
OTU2852	OTU2247	0.694902
OTU2852	OTU2715	-0.826553
OTU2852	OTU2348	0.621379
OTU4176	OTU2456	0.693807
OTU4176	OTU706	-0.886585
OTU4176	OTU1587	0.894864
OTU4176	OTU2845	0.750173
OTU4176	OTU2577	0.830839
OTU4176	OTU2247	0.646164
OTU4176	OTU2715	-0.761273
OTU2456	OTU2519	0.68044
OTU2456	OTU706	-0.70012
OTU2456	OTU1587	0.638499
OTU2456	OTU2845	0.648101
OTU2456	OTU2577	0.693335
OTU2456	OTU2247	0.66992
OTU2456	OTU2715	-0.624968
OTU2519	OTU2247	0.656012
OTU2907	OTU2845	0.61146
OTU2907	OTU118	0.610455
OTU706	OTU1587	-0.812526
OTU706	OTU30	-0.617864
OTU706	OTU2845	-0.710897
OTU706	OTU2577	-0.766256
OTU706	OTU2247	-0.603979
OTU706	OTU2715	0.681575
OTU706	OTU2348	-0.609978
OTU1587	OTU30	0.679984
OTU1587	OTU2845	0.742976
OTU1587	OTU2577	0.819912
OTU1587	OTU2247	0.664264
OTU1587	OTU2715	-0.810086
OTU30	OTU2845	0.668607
OTU30	OTU2577	0.645516
OTU2845	OTU2577	0.87112
OTU2845	OTU2436	0.691077
OTU2845	OTU2247	0.663071
OTU2845	OTU2715	-0.683863
OTU2845	OTU2793	0.612371
OTU2845	OTU2348	0.728986
OTU2577	OTU2715	-0.751759
OTU2577	OTU2348	0.65866
OTU2436	OTU2793	0.766622
OTU2436	OTU2348	0.695714
